# Supplementary material for: SILVA, RDP, Greengenes, NCBI and OTT — how do these taxonomies compare?
Source: PubMed Central journal article supplement (PMC5374703; doi:10.1186/s12864-017-3501-4), 2017-03-14
Supplement: 12864_2017_3501_MOESM1_ESM.pdf [file 12864_2017_3501_MOESM1_ESM.pdf]

# Supplementary material for SILVA, RDP, Greengenes, NCBI and OTT — How do these tax- onomies compare?

## Part A: Mapping dissimilarities

|                     | Strict | Loose | Path | Sparklines |
|---------------------|--------|-------|------|------------|
| RDP to SILVA        | 0.51   | 0.06  | 0.01 | █ - -      |
| Greengenes to SILVA | 0.21   | 0.12  | 0.03 | - - -      |
| NCBI to SILVA       | 0.51   | 0.34  | 0.08 | █ █ -      |
| OTT to SILVA        | 0.48   | 0.32  | 0.06 | █ █ -      |
| SILVA to RDP        | 0.68   | 0.48  | 0.02 | █ █ -      |
| Greengenes to RDP   | 0.21   | 0.15  | 0.02 | - - -      |
| NCBI to RDP         | 0.97   | 0.88  | 0.05 | █ █ █      |
| OTT to RDP          | 0.99   | 0.82  | 0.08 | █ █ █      |
| SILVA to Greengenes | 0.70   | 0.67  | 0.03 | █ █ █      |
| RDP to Greengenes   | 0.53   | 0.50  | 0.01 | █ █ █      |
| NCBI to Greengenes  | 0.97   | 0.94  | 0.07 | █ █ █      |
| OTT to Greengenes   | 0.99   | 0.96  | 0.11 | █ █ █      |
| SILVA to NCBI       | 0.40   | 0.06  | 0.02 | █ - -      |
| RDP to NCBI         | 0.50   | 0.02  | 0.01 | █ - -      |
| Greengenes to NCBI  | 0.19   | 0.10  | 0.02 | - - -      |
| OTT to NCBI         | 0.29   | 0.12  | 0.00 | █ - -      |
| SILVA to OTT        | 0.42   | 0.06  | 0.02 | █ - -      |
| RDP to OTT          | 0.54   | 0.03  | 0.01 | █ - -      |
| Greengenes to OTT   | 0.26   | 0.11  | 0.02 | - - -      |
| NCBI to OTT         | 0.25   | 0.02  | 0.00 | █ - -      |

Table S1: Mapping dissimilarities for all pairs of taxonomies. Sparklines indicate the magnitudes of strict, loose and path mapping dissimilarities for each pair of taxonomies and are provided as a quick overview of the table.

|        | SILVA | RDP  | Greengenes | NCBI  | OTT    |
|--------|-------|------|------------|-------|--------|
| Root   | 1     | 1    | 1          | 1     | 1      |
| Domain | 3     | 8    | 2          | 5     | 3      |
| Phylum | 256   | 87   | 88         | 214   | 213    |
| Class  | 585   | 186  | 248        | 304   | 357    |
| Order  | 1126  | 403  | 404        | 1392  | 1575   |
| Family | 1409  | 1227 | 513        | 8391  | 15584  |
| Genus  | 8529  | 4175 | 1200       | 79573 | 214991 |

Table S2: Number of nodes at each rank in the five taxonomies.

## **Part B: Detailed mapping summaries**

Below we provide parallel sets plots and heatmaps that give a broader overview of each mapping than a summary score as shown in the main publication.

### **Parallel sets**

Bars in the parallel sets plots are of constant size for each rank and the actual number of nodes is indicated by the number on the side. Parallel flow lines indicate perfect mappings whereas lines going upwards show mapping to higher ranks. Ranks are displayed in the same order in all of the plots (from the top): domain, phylum, class, order, family, genus, species.

### **Heatmaps**

Values in heatmaps are normalized by each row. Bright diagonal indicates that most of the nodes were mapped to the same rank, whereas a column popping out signifies high incompatibility below the rank associated with the column.

## SILVA to RDP

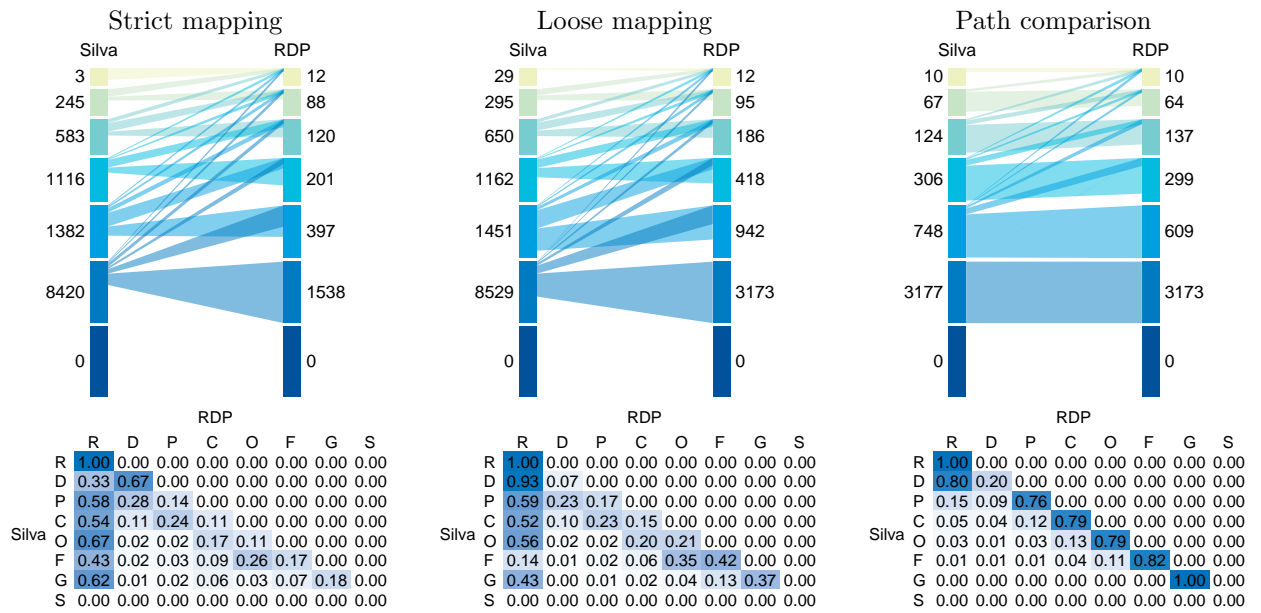

## RDP to SILVA

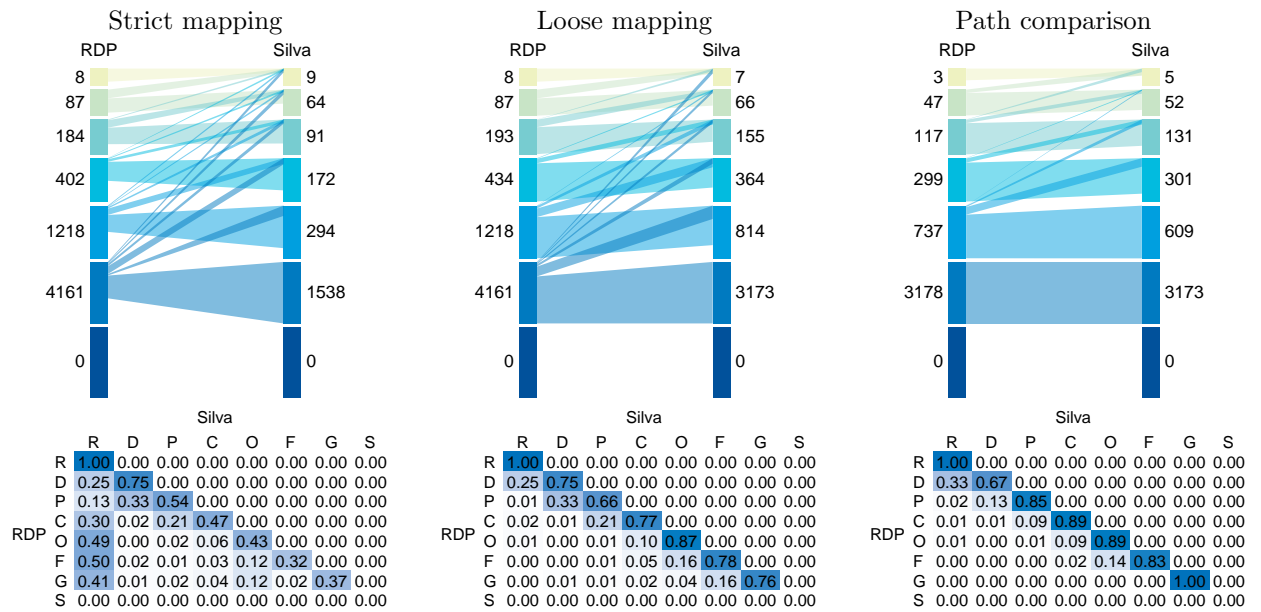

## SILVA to Greengenes

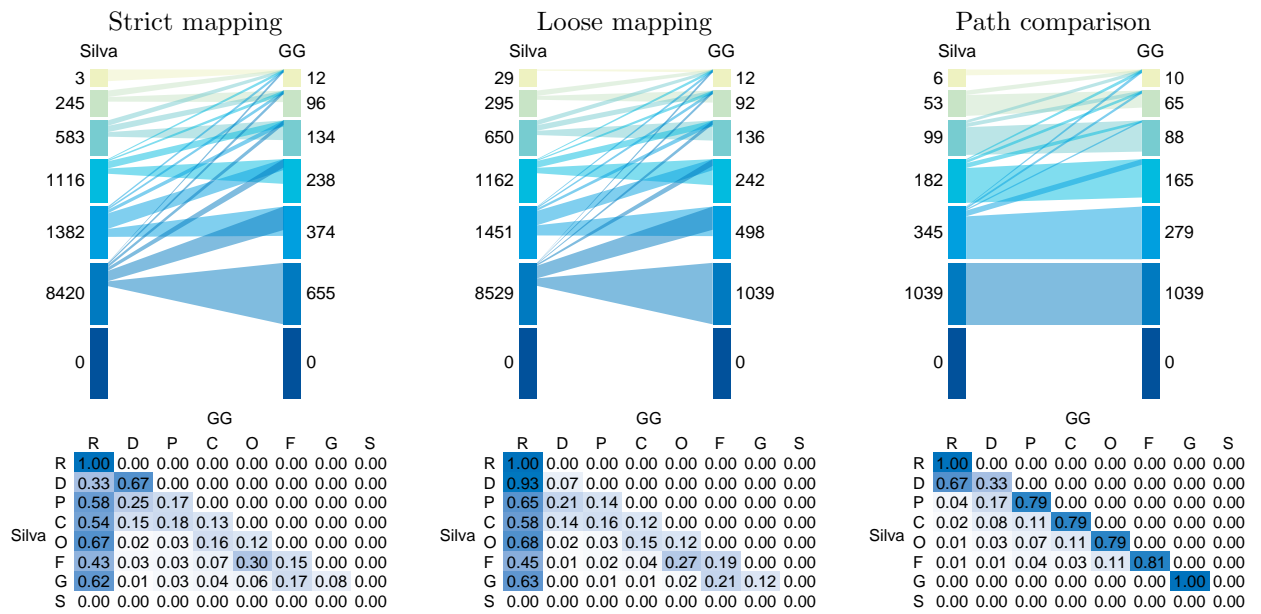

## Greengenes to SILVA

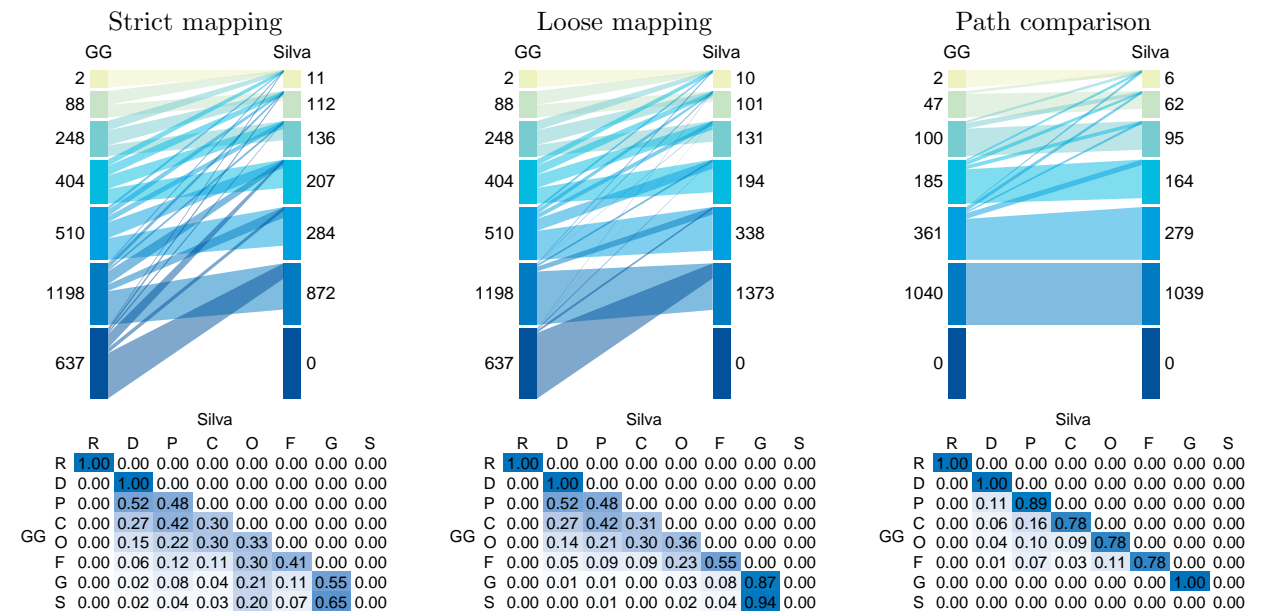

## SILVA to NCBI

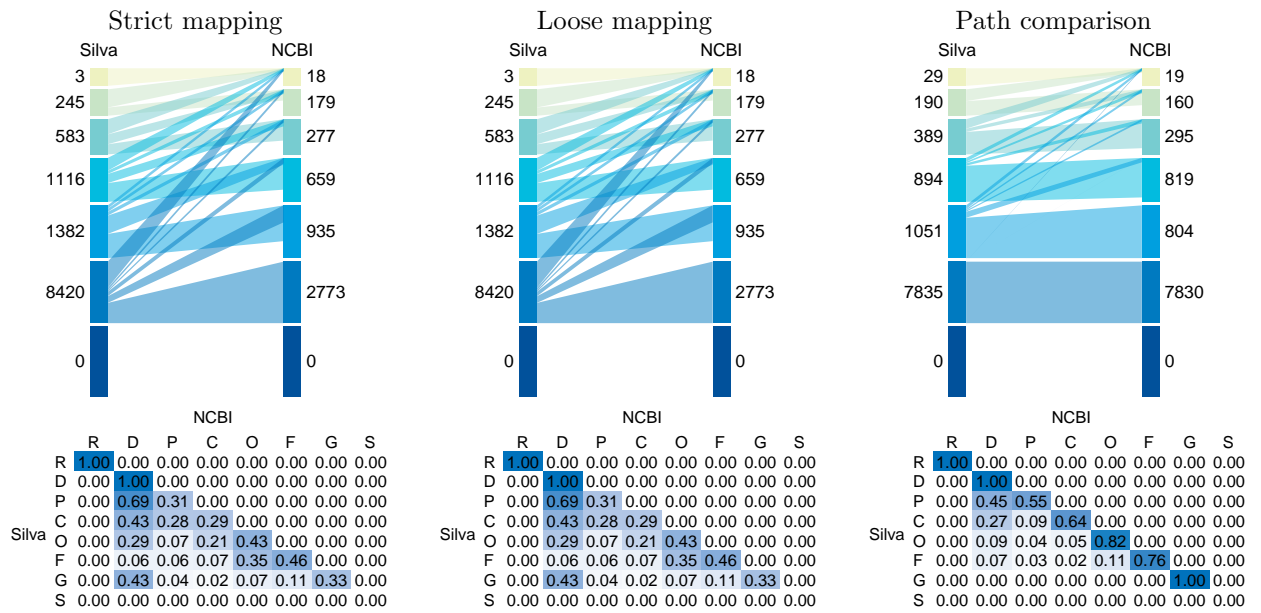

## NCBI to SILVA

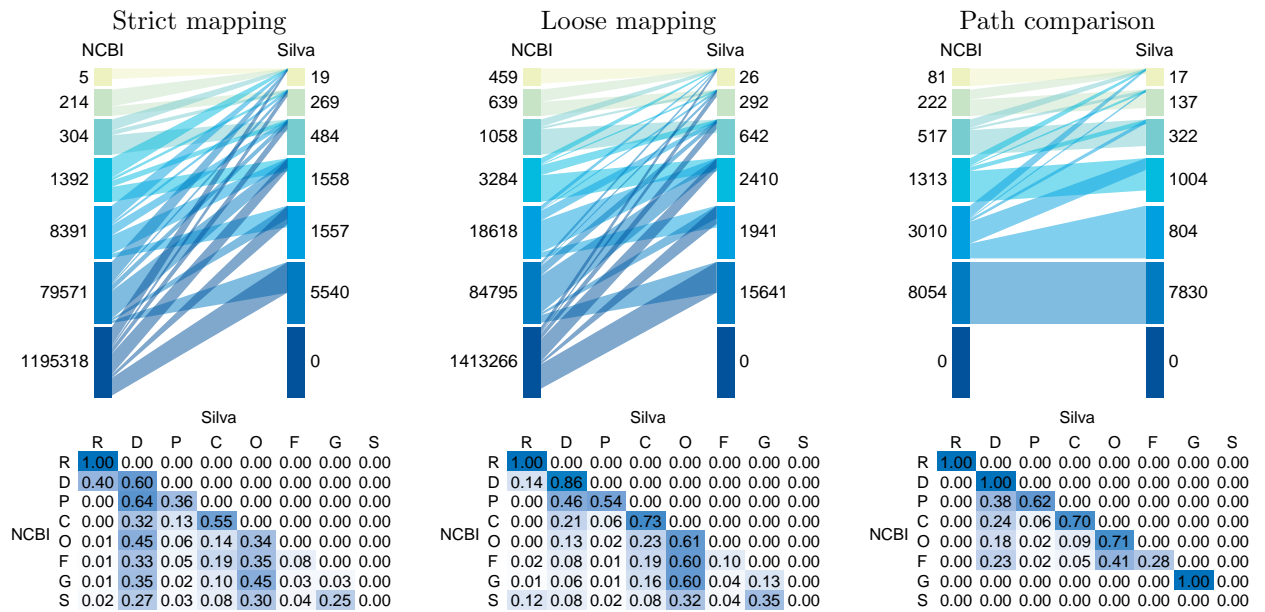

## SILVA to OTT

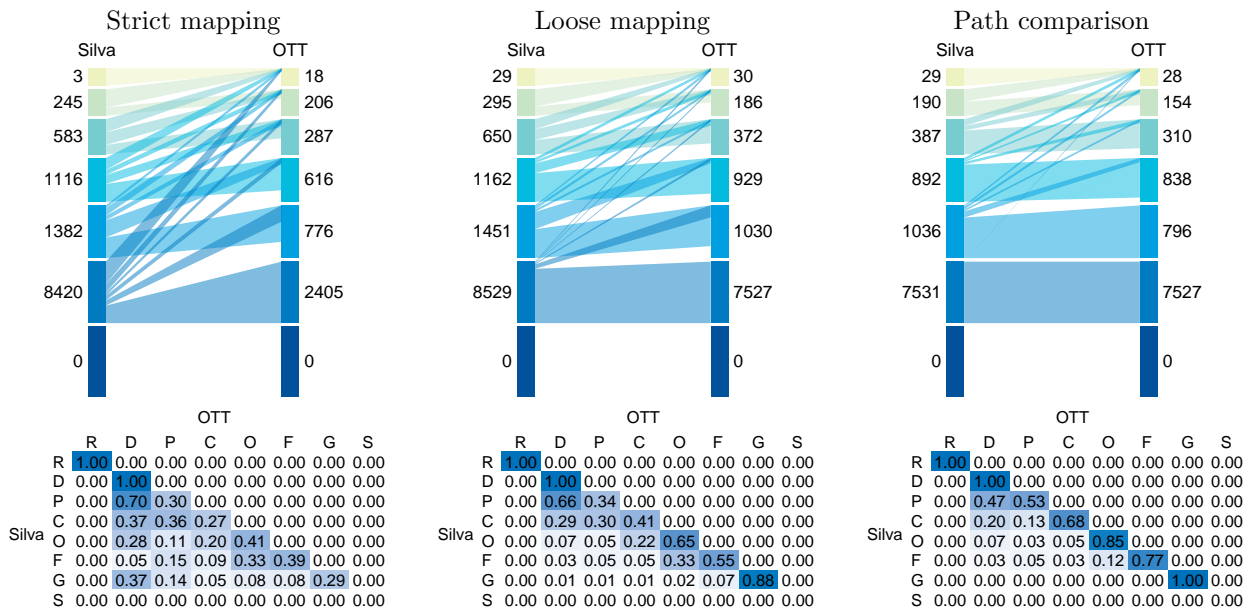

## OTT to SILVA

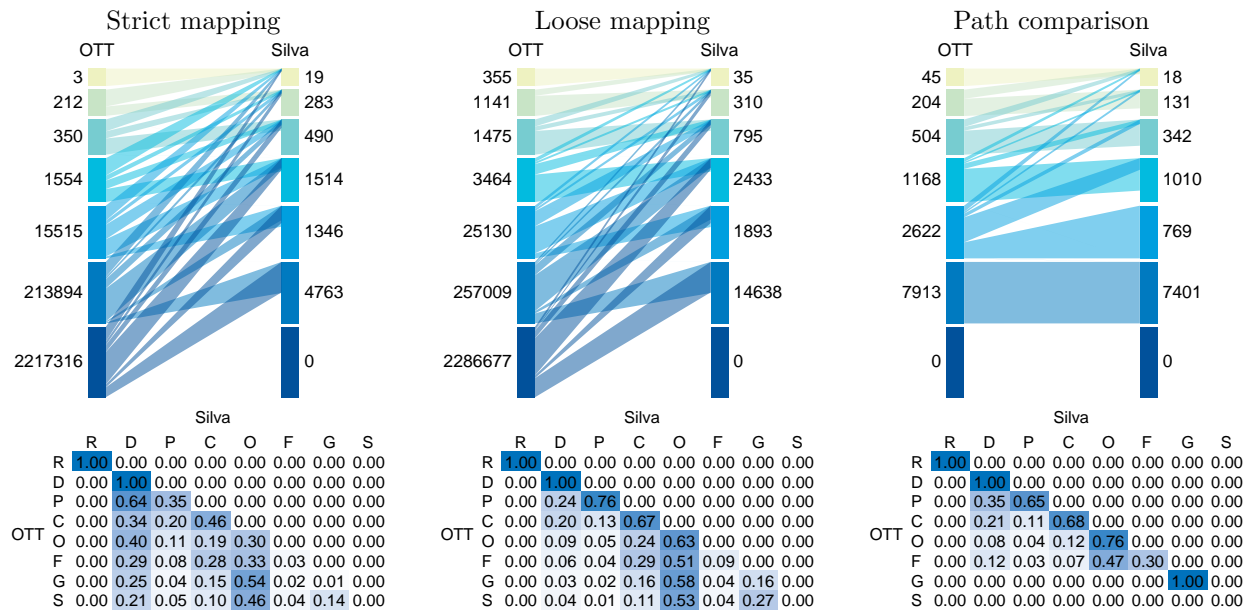

## RDP to Greengenes

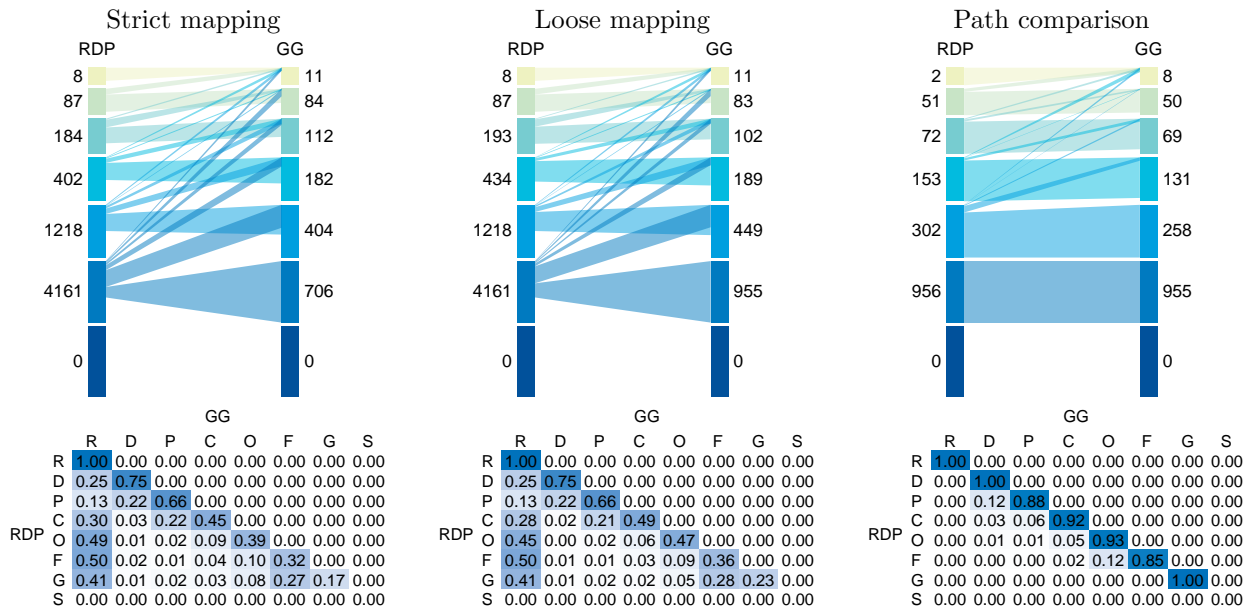

## Greengenes to RDP

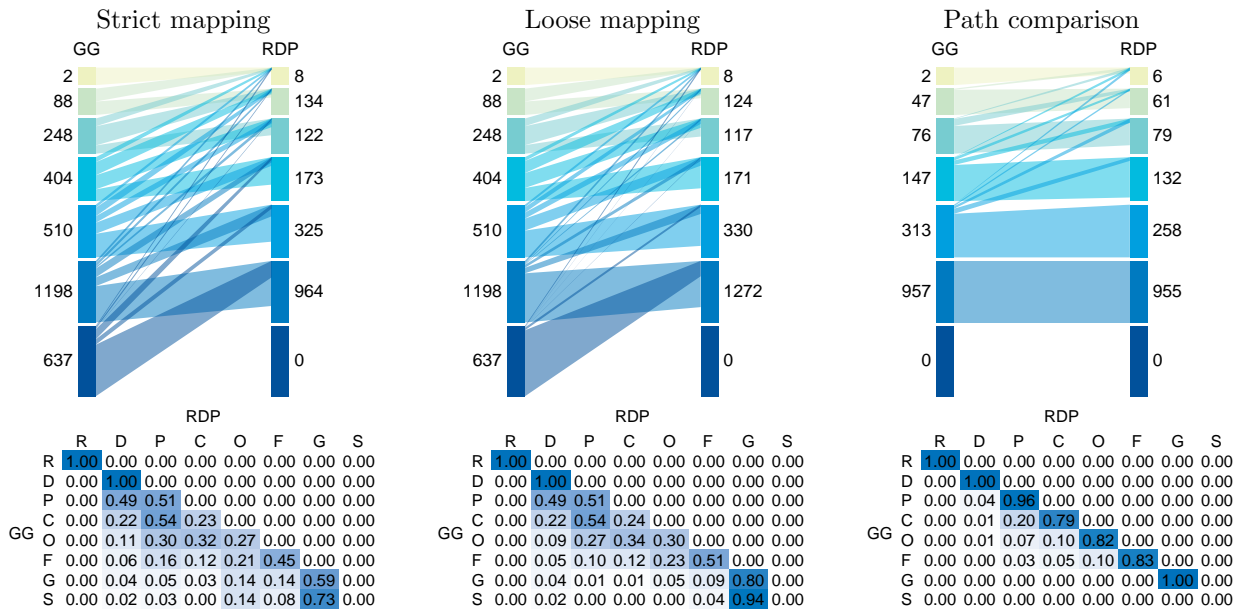

## RDP to NCBI

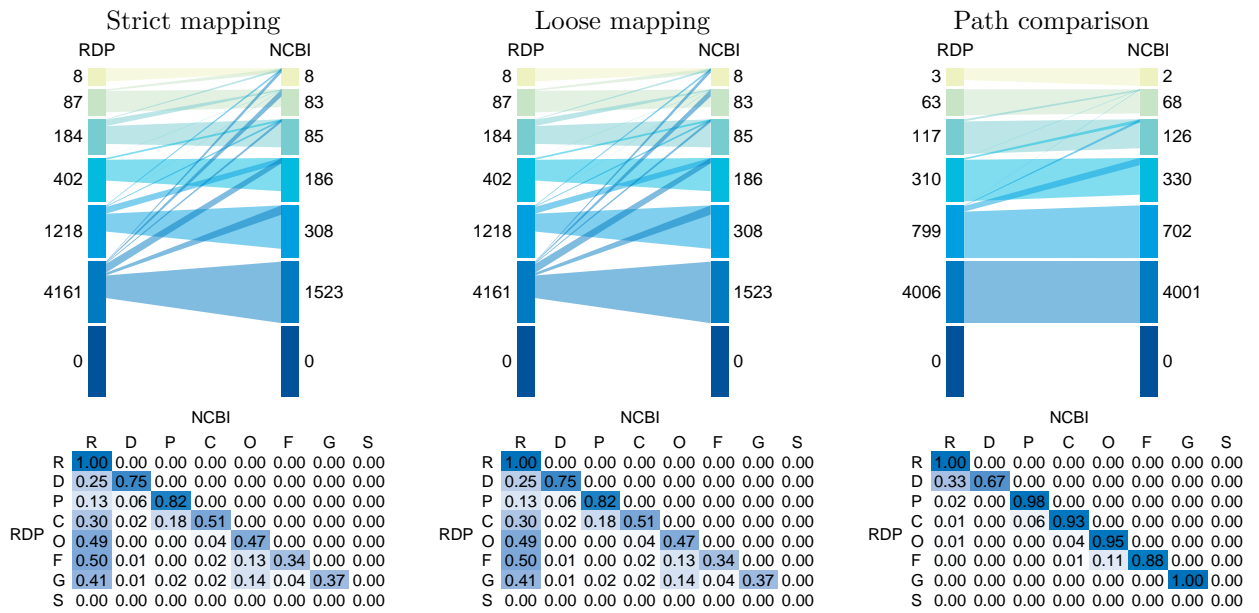

## NCBI to RDP

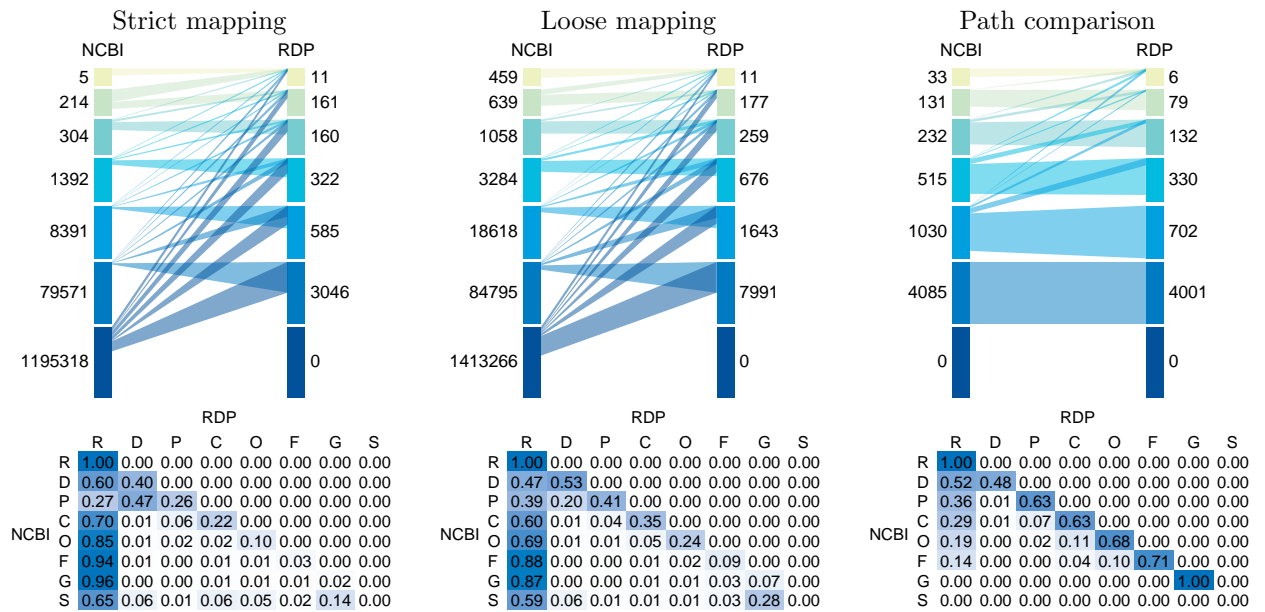



## RDP to OTT

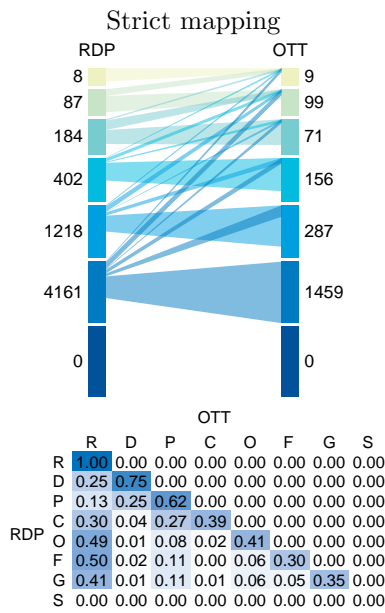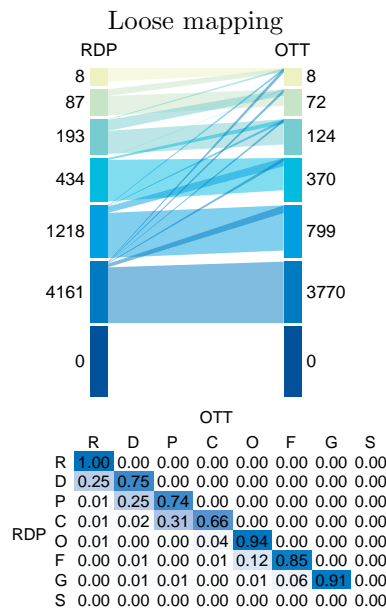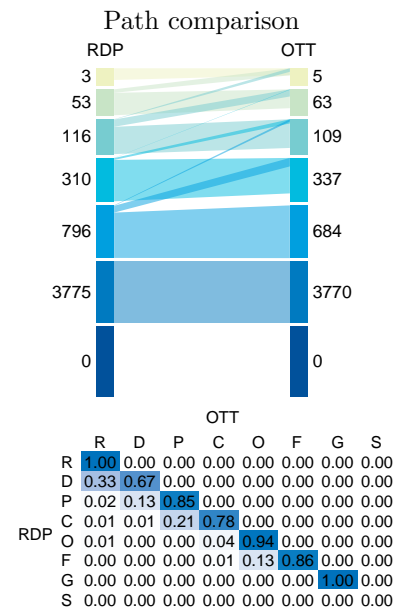

## OTT to RDP

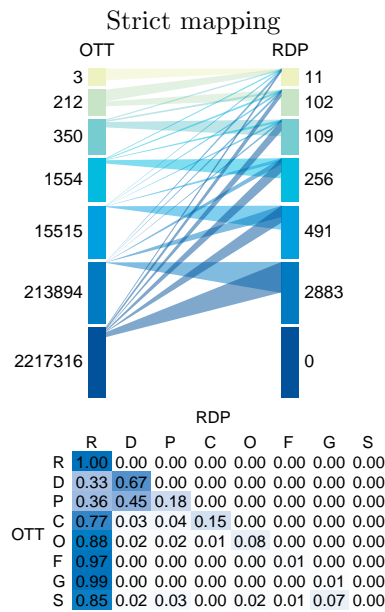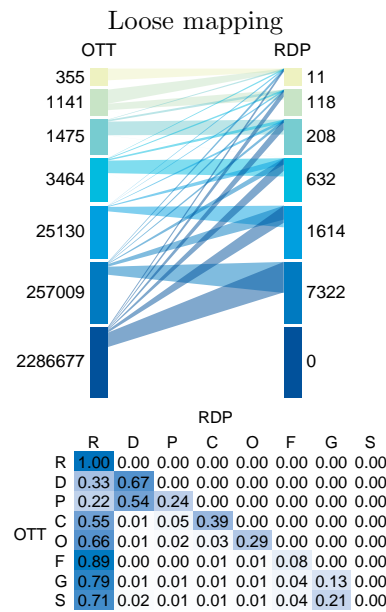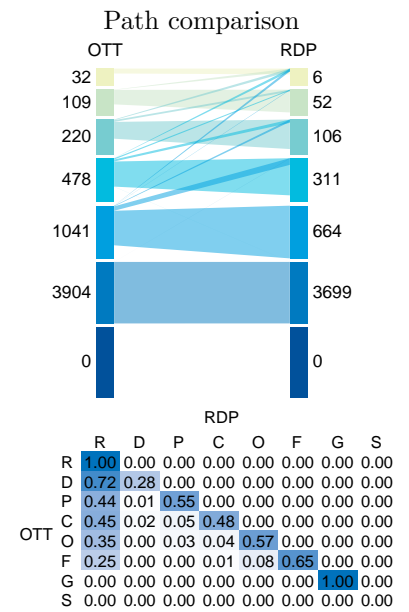

## Greengenes to NCBI

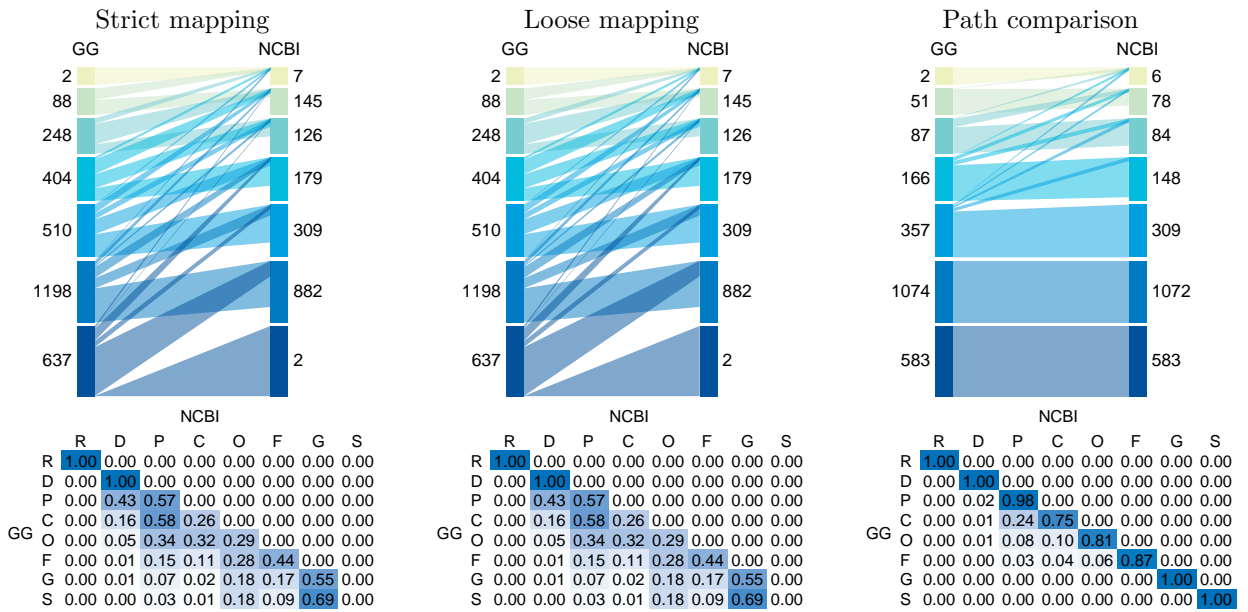

## NCBI to Greengenes

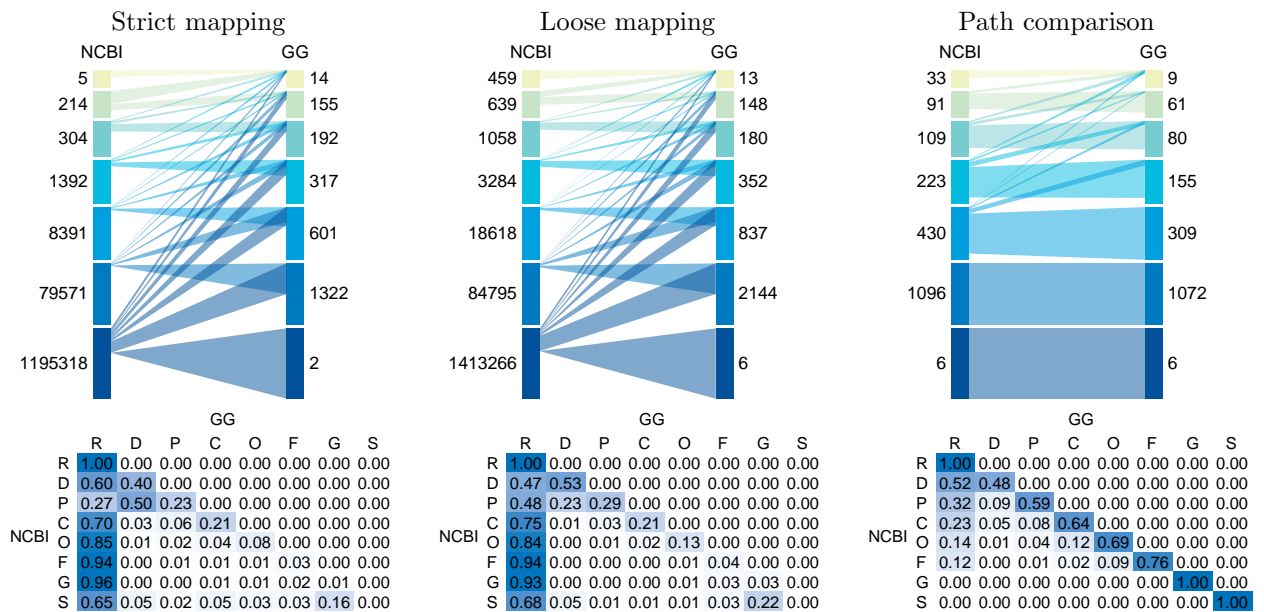

## Greengenes to OTT

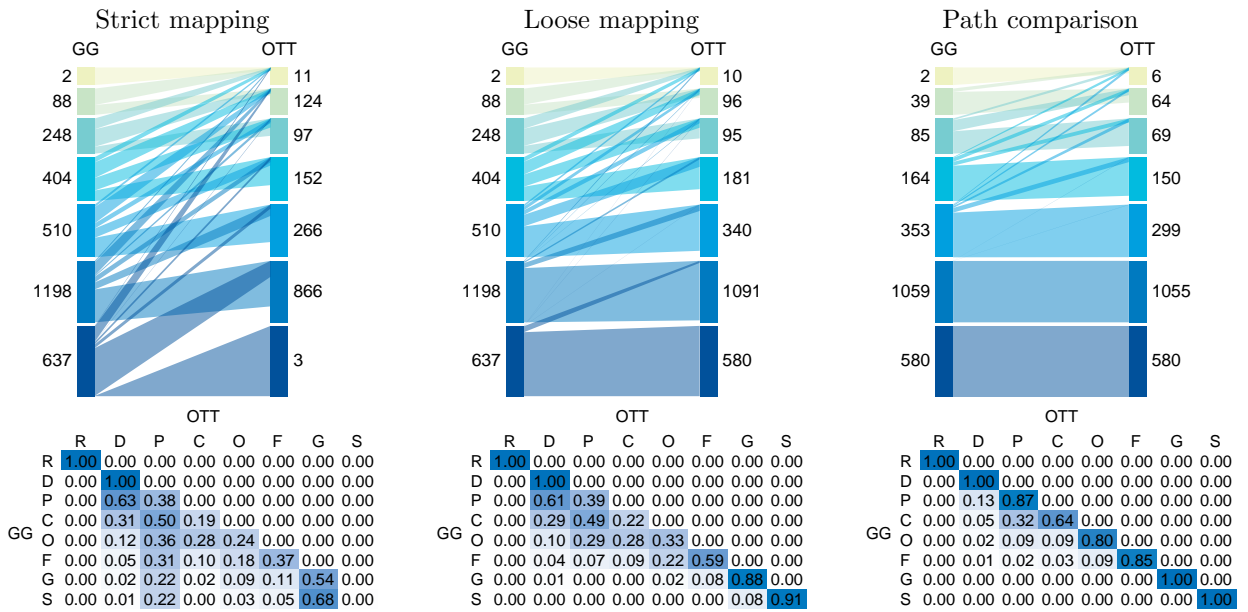

## OTT to Greengenes

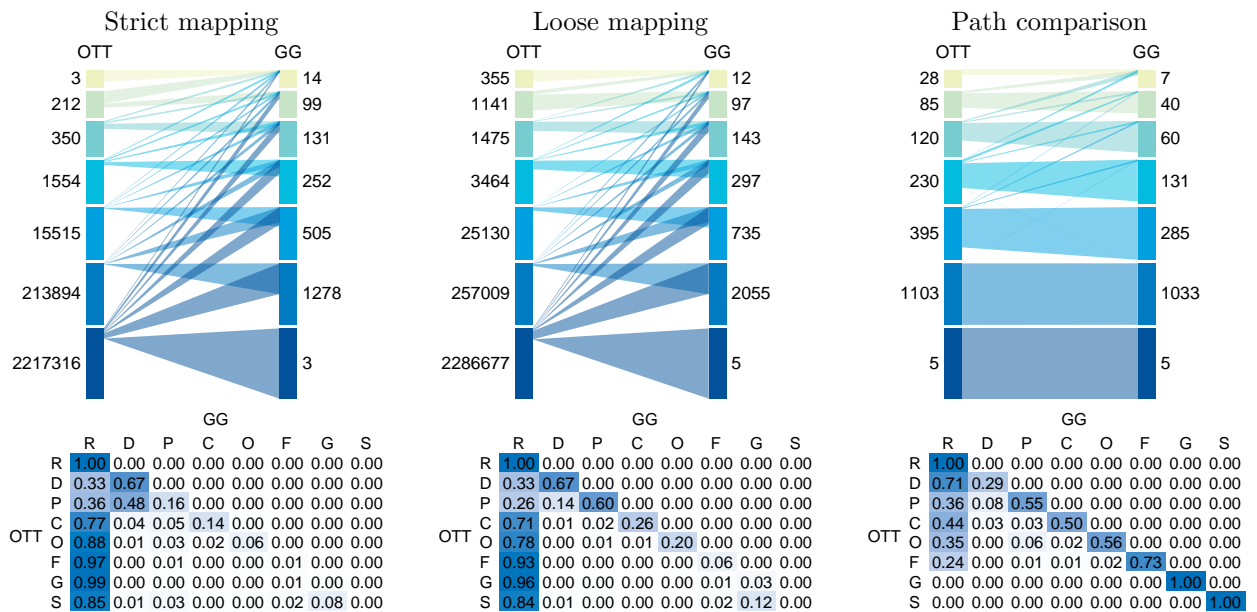

## NCBI to OTT

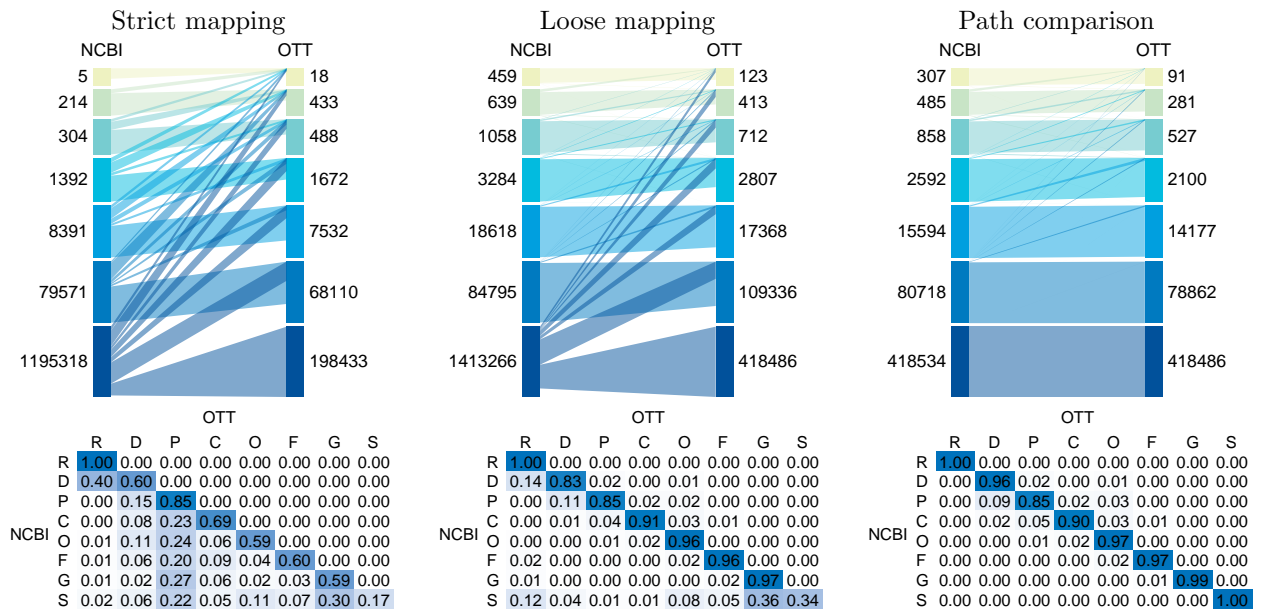

## OTT to NCBI

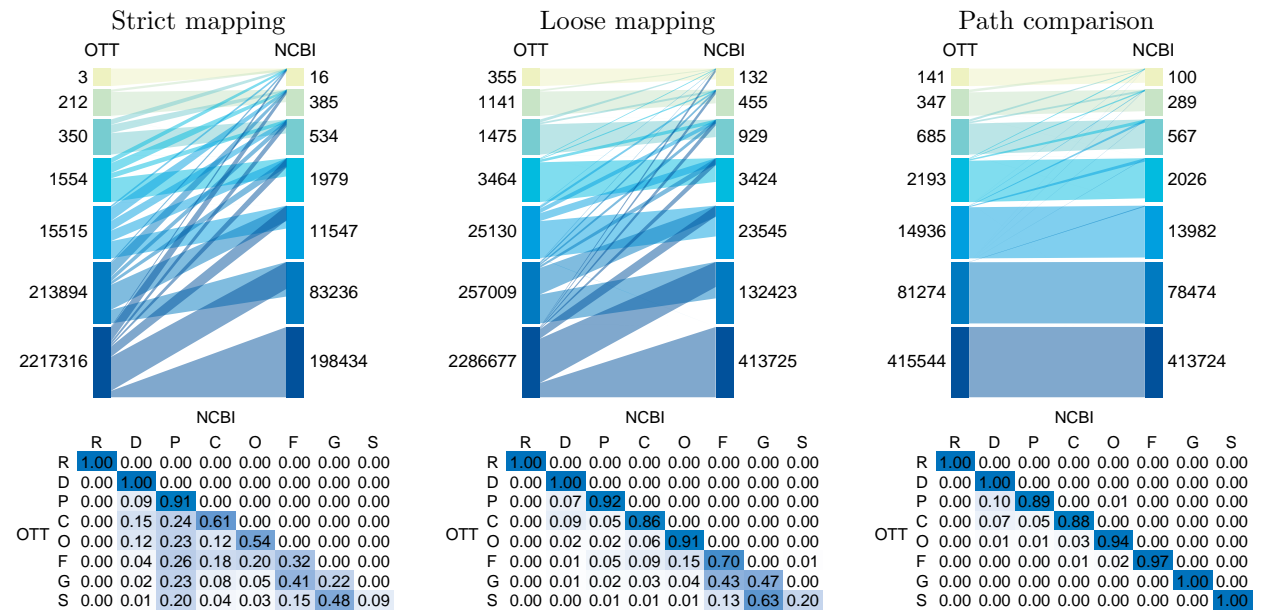

## Part C: Comparisons limited to Bacteria and Archaea domains

|                     | Strict | Loose | Path | Sparklines |
|---------------------|--------|-------|------|------------|
| RDP to SILVA        | 0.14   | 0.03  | 0.01 | - - -      |
| Greengenes to SILVA | 0.21   | 0.12  | 0.03 | - - -      |
| NCBI to SILVA       | 0.18   | 0.08  | 0.02 | - - -      |
| OTT to SILVA        | 0.28   | 0.13  | 0.00 | ■ - -      |
| SILVA to RDP        | 0.21   | 0.10  | 0.01 | - - -      |
| Greengenes to RDP   | 0.21   | 0.15  | 0.02 | - - -      |
| NCBI to RDP         | 0.23   | 0.12  | 0.01 | - - -      |
| OTT to RDP          | 0.30   | 0.19  | 0.00 | ■ - -      |
| SILVA to Greengenes | 0.24   | 0.16  | 0.02 | - - -      |
| RDP to Greengenes   | 0.17   | 0.13  | 0.01 | - - -      |
| NCBI to Greengenes  | 0.25   | 0.16  | 0.02 | - - -      |
| OTT to Greengenes   | 0.32   | 0.21  | 0.01 | ■ - -      |
| SILVA to NCBI       | 0.15   | 0.07  | 0.02 | - - -      |
| RDP to NCBI         | 0.12   | 0.03  | 0.00 | - - -      |
| Greengenes to NCBI  | 0.19   | 0.10  | 0.02 | - - -      |
| OTT to NCBI         | 0.23   | 0.08  | 0.00 | ■ - -      |
| SILVA to OTT        | 0.23   | 0.08  | 0.02 | - - -      |
| RDP to OTT          | 0.19   | 0.04  | 0.01 | - - -      |
| Greengenes to OTT   | 0.26   | 0.11  | 0.02 | - - -      |
| NCBI to OTT         | 0.19   | 0.04  | 0.02 | - - -      |

Table S3: Mapping dissimilarities for all pairs of taxonomies limited to Bacteria and Archaea domains. Sparklines indicate the magnitudes of strict, loose and path mapping dissimilarities for each pair of taxonomies and are provided as a quick overview of the table.

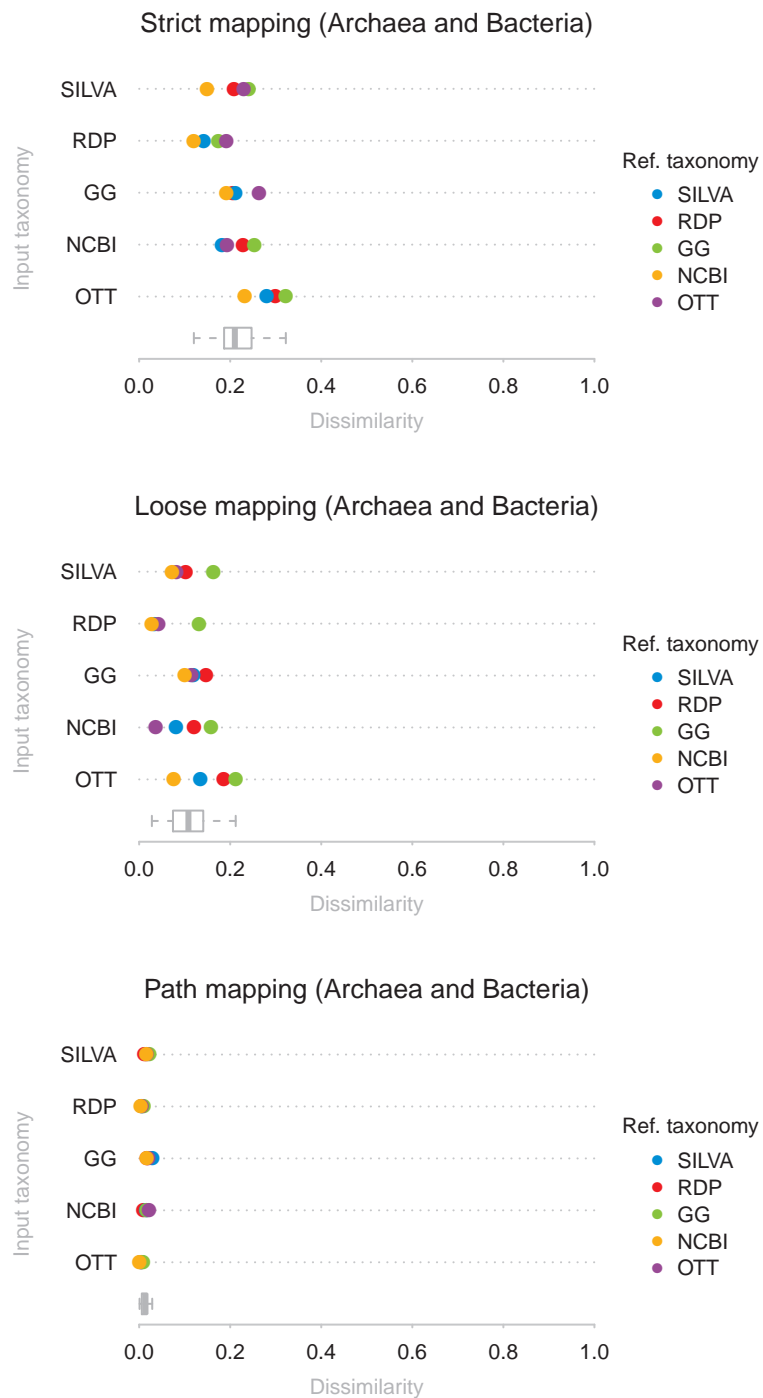

Figure 1: Distributions of mapping dissimilarities.
